# Supplementary material for: Crotonaldehyde hydrogenation on platinum–titanium oxide and platinum–cerium oxide catalysts: selective CO bond hydrogen requires platinum sites beyond the oxide–metal interface
Source: Royal Society of Chemistry journal article supplement (doi:10.1039/c6cy00858e), 2016-01-01
Supplement: c6cy00858e1.pdf [file c6cy00858e1.pdf]

## Crotonaldehyde Hydrogenation on Platinum–Titanium Oxide and Platinum–Cerium Oxide Catalysts: Selective C=O Bond Hydrogen Requires Platinum Sites Beyond the Oxide–Metal Interface

Supporting Information

Xin Yang, Yutichai Mueanggern, Quinn A. Baker, and L. Robert Baker\*

The Ohio State University, Department of Chemistry and Biochemistry, Columbus, OH 43210

\*Corresponding Author Email: baker.2364@osu.edu; Phone: (614) 292–2088

### Root-Mean-Squared Distance for Surface Diffusion

The following equation is used to estimate the root-mean-square (rms) distance for the diffusion of a reaction intermediate on a catalyst surface:

$$\langle x^2 \rangle^{\frac{1}{2}} = \sqrt{4 \cdot D \cdot t} \quad (1)$$

where  $\langle x^2 \rangle^{1/2}$  is the rms distance,  $D$  is the diffusion coefficient, and  $t$  is the time the molecule is allowed to diffuse. In this equation,  $D$  is given by

$$D = D_0 \cdot \exp\left(\frac{-E_A}{k_B T}\right) \cdot (1 - \theta) \quad (2)$$

where  $E_A$  is the activation barrier to surface hopping,  $k_B$  is the Boltzmann constant,  $T$  is the catalyst temperature, and  $\theta$  is the relative coverage of the catalyst surface during reaction. In this equation  $D_0$  is given by

$$D_0 = \frac{1}{4} \cdot v_0 \cdot d^2 \quad (3)$$

where  $v_0$  is the hopping frequency and  $d$  is the distance between adjacent surface sites of the adsorbate.

Here we seek only to estimate these parameters to obtain a sense of possible rms diffusion distances for the crotyl-oxy intermediate on a Pt surface. Consequently, to obtain Fig. 1S, we estimate that  $v_0$  is equal to  $10^{12}$  Hz or 1/ps,  $d$  is estimated as 0.2 nm based on the approximate length of a Pt–Pt bond in an fcc lattice, and  $\theta$  is estimated to be 0.95. We then calculate the rms distance,  $\langle x^2 \rangle^{1/2}$ , as a function of time for a range of surface hopping barriers,  $E_A$ .

Although we do not know that exact activation energy for surface hopping of a crotyl-oxy intermediate, for reference we note that  $E_A$  is 18.4 kJ/mol for CO on Pt<sup>1</sup>, significantly lower than the hopping barriers considered here. As seen in Fig. 1S below, for a hopping barrier of 60 kJ/mol and a residence time given by the turnover frequency for crotonaldehyde hydrogenation, the rms distance is predicted to be on the order of 10 nm. Although this is only a crude approximation, it provides a sense for the distances that reaction intermediates may travel on the catalyst surface during a turnover event.

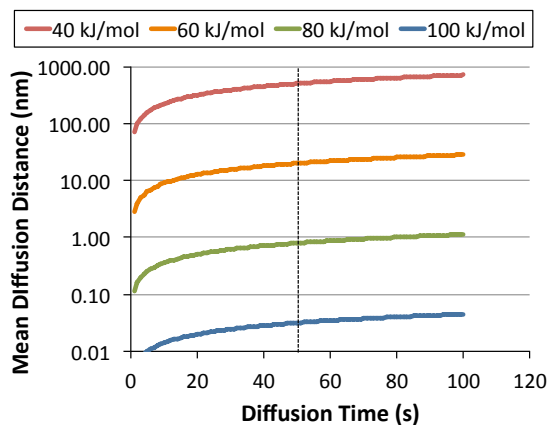

**Fig. S1** Calculated root-mean-square diffusion distance versus time for a molecule adsorbed on a catalyst surface. The dashed vertical line at 50 s represents approximately one divided by the turnover frequency for C=O bond hydrogenation in these systems (see Fig. 9), which serves as an estimate of a reactant's lifetime on the catalyst surface.

## References

1. Reutt-Robey, J.E., Doren, D.J., Chabal, Y.J. & Christman, S.B. Microscopic Co Diffusion on a Pt(111) Surface by Time-Resolved Infrared Spectroscopy. *Physical Review Letters* **61**, 2778-2781 (1988).
